# Supplementary material for: Age- and glycemia-related miR-126-3p levels in plasma and endothelial cells
Source: publisher site journal article supplement (doi:10.18632/aging.100693), 2014-10-07
Supplement: Supplementary file [file aging-v6i9-100693-supplementary-material-SD1.pdf]

## SUPPLEMENTARY TABLE

**Supplementary Table 1. Circulating miR-126 and biological variables: partial correlation coefficient controlled for age**

| <b>Plasma miR-126</b>  | <b>Partial R coefficient</b> | <b>P</b> |
|------------------------|------------------------------|----------|
| <b>Fasting glucose</b> | -0.15                        | 0.02     |
| <b>HbA1c</b>           | -0.15                        | 0.01     |
| <b>Platelets</b>       | 0.17                         | 0.005    |
| <b>ApoAI</b>           | 0.15                         | 0.03     |

Only significant results are shown considering a correlation coefficient cut-off of 0.15 and a p value <0.05.
